# Supplementary material
Source: PubMed Central journal article supplement (PMC10130759)
Supplement: NIHMS1893244-supplement-Supplemental_Data.pdf [file NIHMS1893244-supplement-Supplemental_Data.pdf]

Supplementary Materials for  
**Quantitative immunopeptidomics reveals a tumor stroma–specific target for  
T cell therapy**

Gloria B. Kim *et al.*

Corresponding author: Toni Weinschenk, [toni.weinschenk@immatics.com](mailto:toni.weinschenk@immatics.com); James L. Riley, [rileyj@upenn.edu](mailto:rileyj@upenn.edu)

*Sci. Transl. Med.* **14**, eabo6135 (2022)  
DOI: 10.1126/scitranslmed.abo6135

**The PDF file includes:**

Figs. S1 to S8  
Tables S1 to S4

**Other Supplementary Material for this manuscript includes the following:**

MDAR Reproducibility Checklist

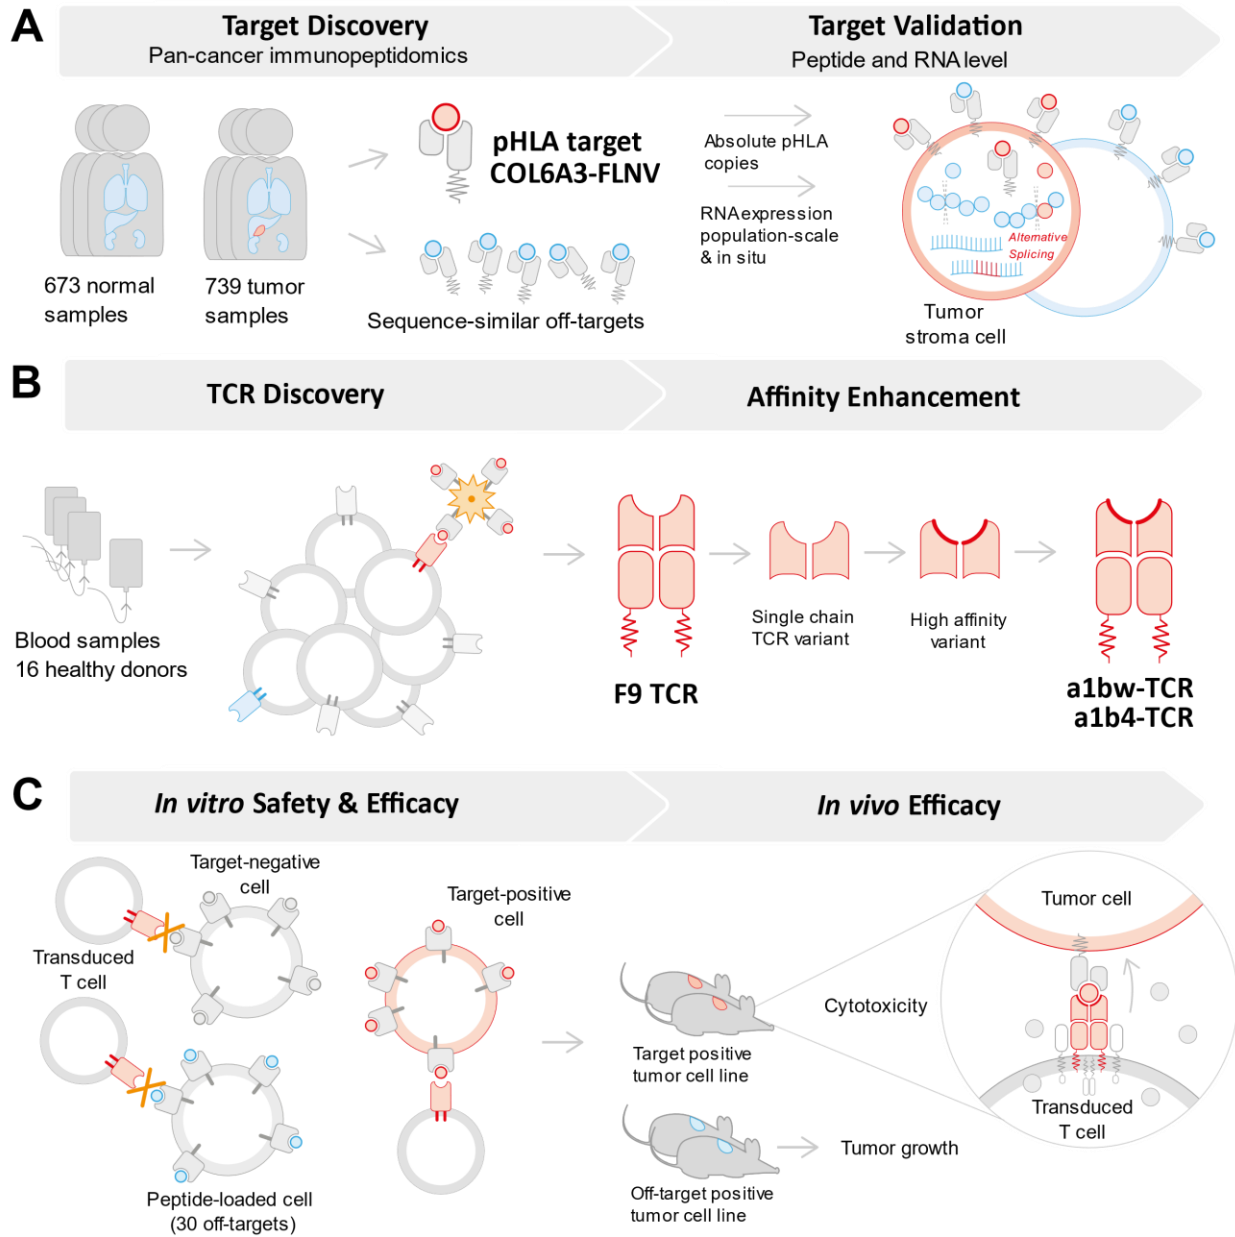

**Supplementary Figure 1. Schematic outline summarizing the discovery and validation of a HLA-restricted cancer target and TCRs suitable for adoptive T cell therapy.** Three phases are highlighted starting with target discovery and validation, TCR discovery and engineering and finally preclinical in vitro and in vivo efficacy and safety studies. **(A)** Target discovery is based on pan-cancer population-scale immunopeptidomics identifying tumor-specific HLA-A\*02 peptide targets together with potential off-targets used in TCR discovery as counter targets and for in vitro safety studies. Target validation contributed additional target characteristics about mRNA splicing (RNA-sequencing), absolute copy numbers (targeted mass spectrometry) and stroma association (in situ hybridization). **(B)** Suitable TCRs were extracted from blood of healthy donors incorporating early screening of sequence similar counter targets identified by immunopeptidomics in the first step. TCR F9 with favorable characteristics was engineered into two soluble and high affinity variants. **(C)** Preclinical safety and efficacy were finally

assessed by use of target negative and positive cell lines as well as cell lines loaded with 30 sequence similar peptides. Finally, in vivo efficacy in mouse models was evaluated.

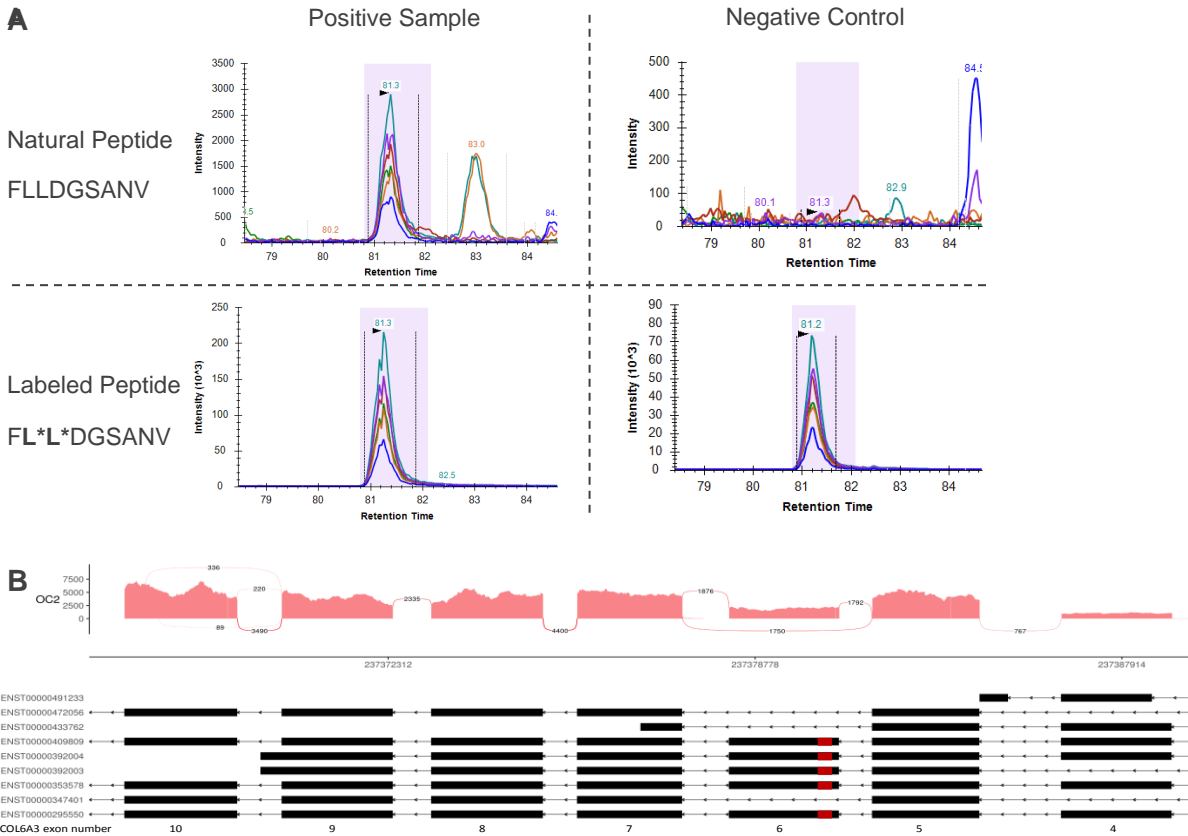

**Supplementary Figure 2. Validation of COL6A3-FLNV sequence and alternative splicing of exon 6. (A)** Verification of COL6A3-FLNV peptide sequence by co-elution with stable isotope labeled internal control on ovarian cancer sample OC2. Adrenal gland from a healthy donor was used as negative control. **(B)** Sashimi plots for an ovarian cancer sample OC2 illustrating read coverage for individual exons and exon spanning reads that prove alternative splicing events. COL6A3 ENSEMBL annotation is depicted below indicating the position of the COL6A3-FLNV peptide as red squares.

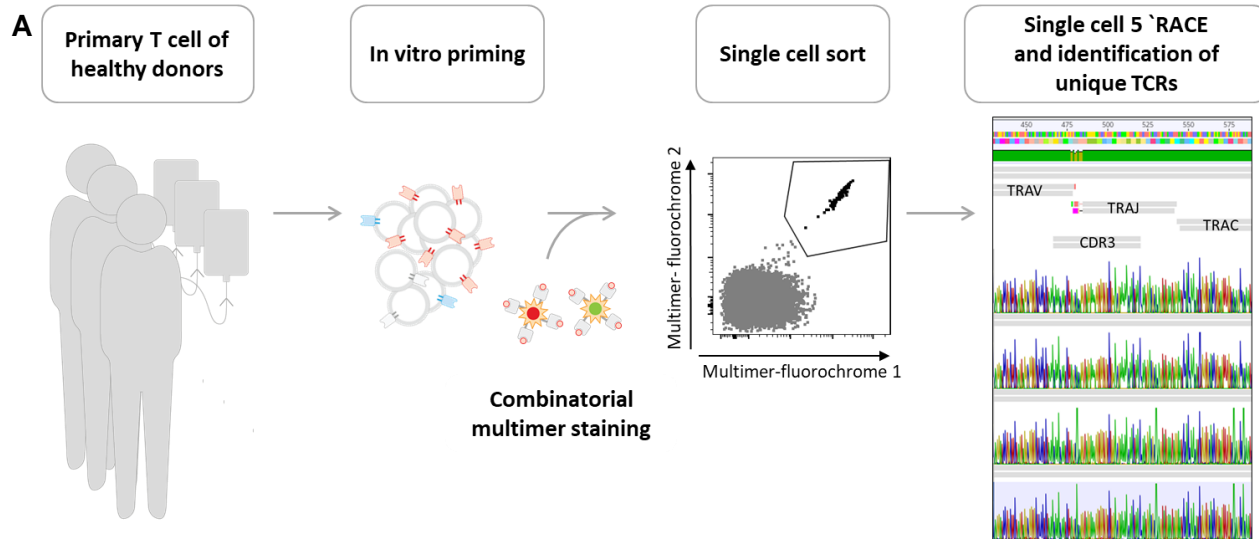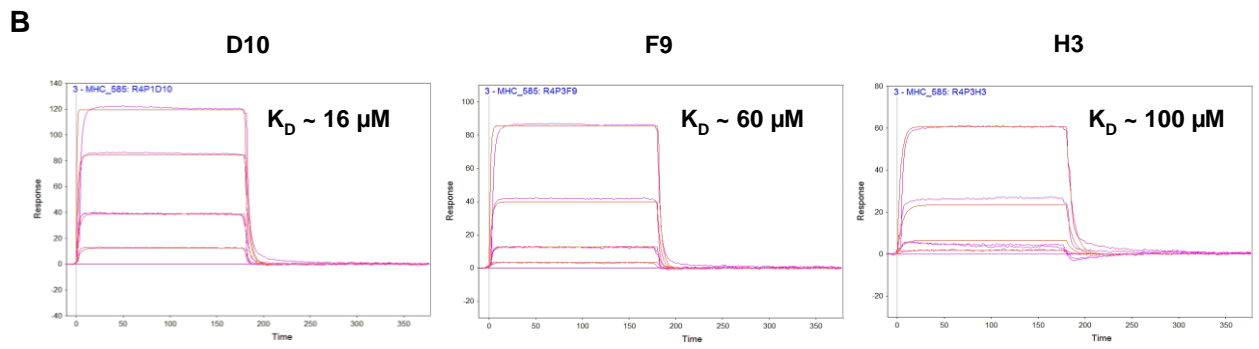

**Supplementary Figure 3. Discovery and characterization of natural COL6A3-specific TCRs. (A)** Summary of the TCR discovery process. **(B)** Surface plasmon resonance (SPR) analysis for binding affinity determination of TCRs, D10, F9, and H3. COL6A3-FLNV in complex with biotinylated HLA-A\*02:01 was immobilized on streptavidin SPR chips and soluble TCR variants of D10, F9, and H3 were applied at concentrations of 0  $\mu\text{M}$ , 1.6  $\mu\text{M}$ , 6.3  $\mu\text{M}$ , 25  $\mu\text{M}$ , and 100  $\mu\text{M}$ , respectively. Binding equilibrium dissociation constants ( $K_D$ ) of 16  $\mu\text{M}$ , 60  $\mu\text{M}$ , and 100  $\mu\text{M}$  were determined for D10, F9, and H3, respectively.

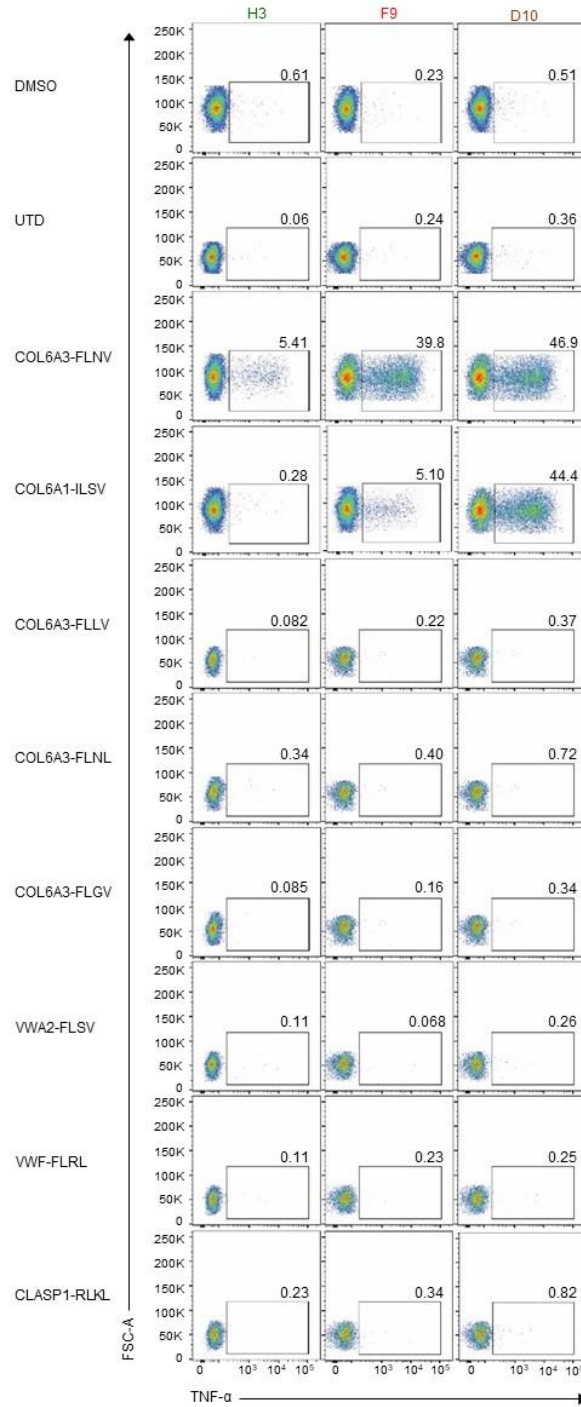

**Supplementary Figure 4. Characterization of TCR specificity using naturally presented similar peptides.**

T cells were mixed with the indicated peptide-loaded K.A2 cells for 4 hours and TNF $\alpha$  intracellular staining is shown for CD8 T cells. Results are representative of three independent experiments with different donors performed in triplicate. Peptide concentrations used were all 10  $\mu$ M.

**A**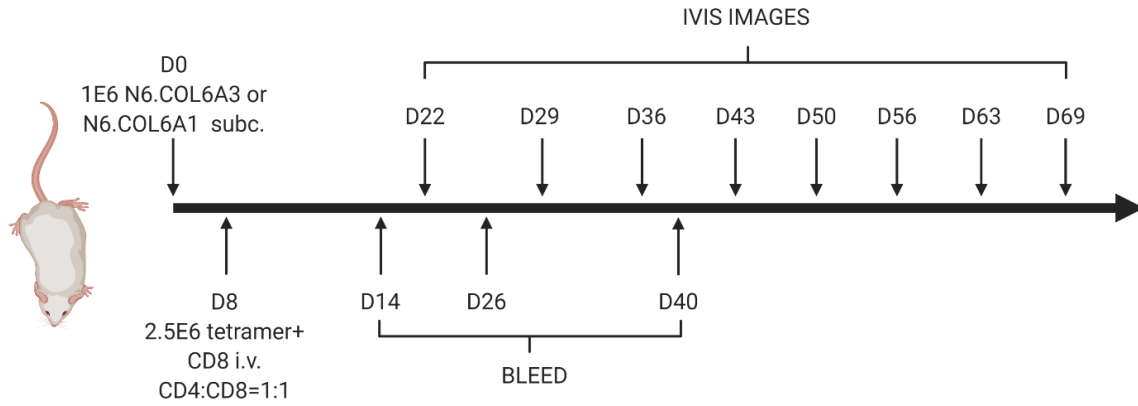**B N6.COL6A3**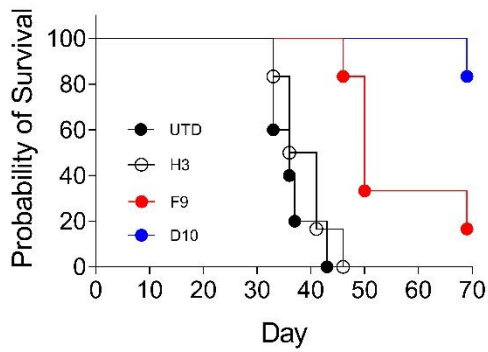**C N6.COL6A1**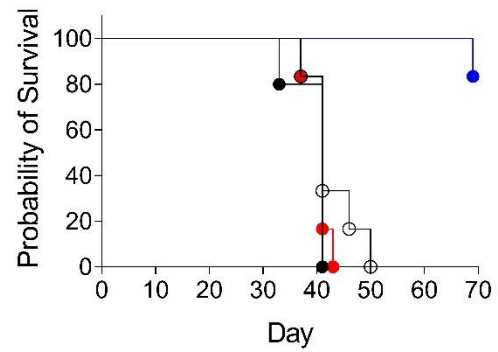

**Supplementary Figure 5. Natural COL6A3-specific TCRs confer limited anti-tumor immunity in vivo. (A)** Timeline of in vivo experiment performed on NSG mice implanted with N6.COL6A3 or N6.COL6A1 cells. Survival curves of N6.COL6A3 group (**B**) and N6.COL6A1 group (**C**).

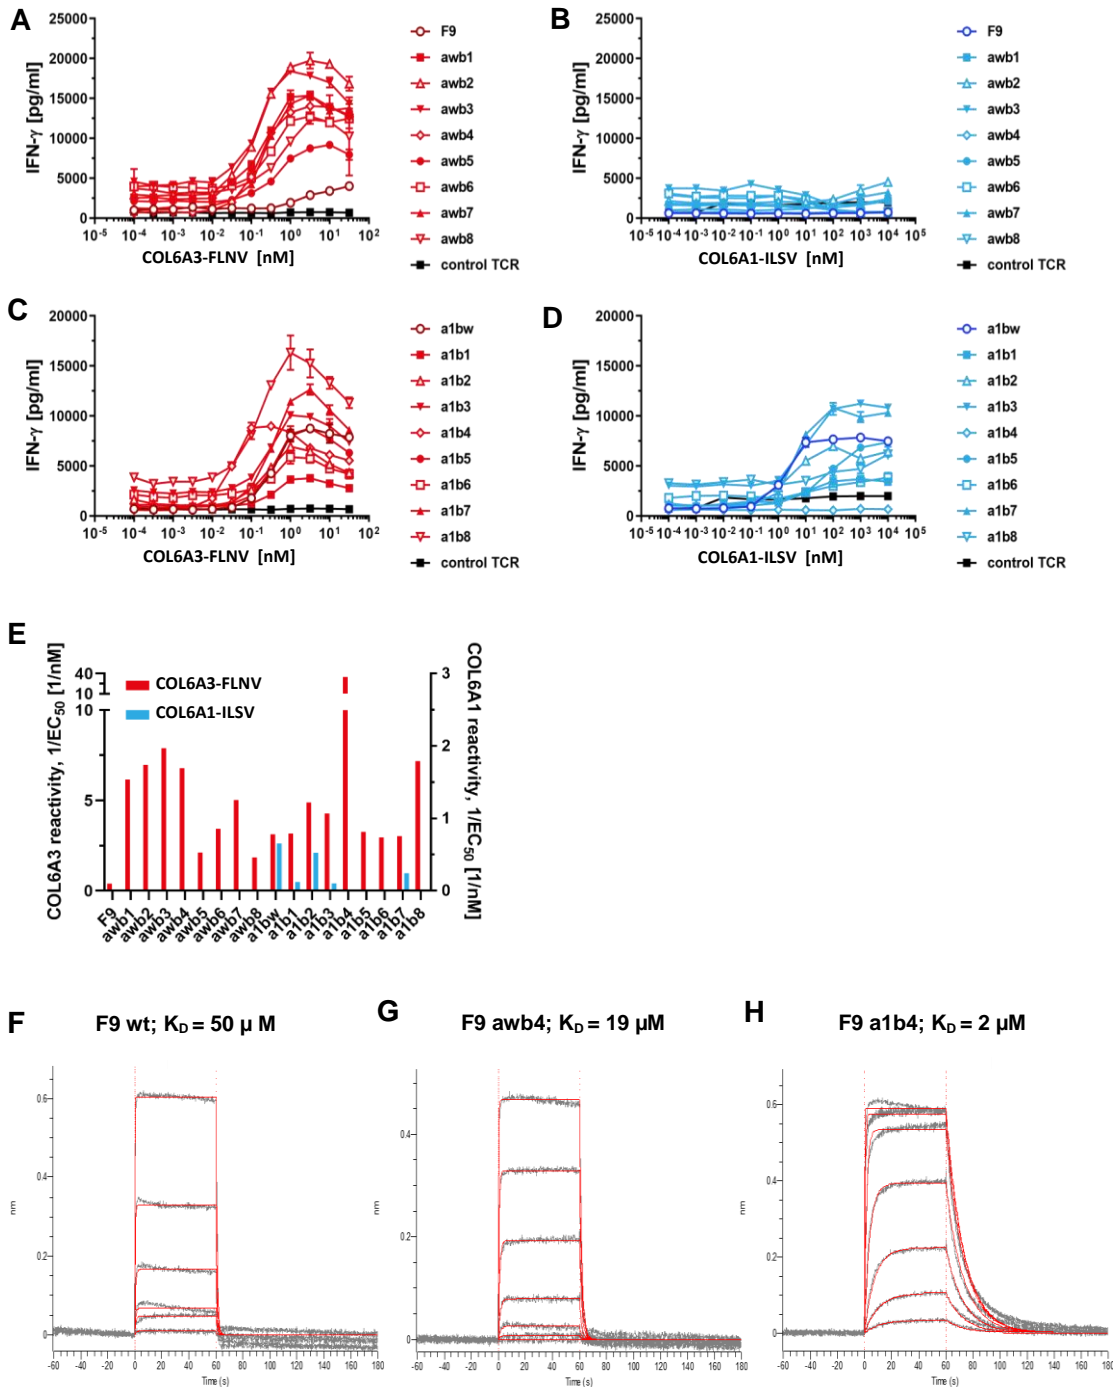

**Supplementary Figure 6. Characterization of affinity-enhanced TCRs.**  $EC_{50}$  determination for reactivity of TCRs with mutations in beta chain against COL6A3-FLNV (**A**) and COL6A1-ILSV (**B**).  $EC_{50}$  determination for reactivity of TCRs with alpha chain mutation combined with mutations in beta chain against COL6A3-FLNV (**C**) and COL6A1-ILSV (**D**). (**E**) Fold change in COL6A3 and COL6A1 reactivity for matured TCR variants compared to F9 variant, (**F-H**) Biolayer interferometry (BLI) analysis for affinity determination of TCR F9 and its matured variants Fawb4 and a1b4. COL6A3-FLNV in complex with biotinylated HLA-A\*02:01 was immobilized on streptavidin BLI sensors and soluble TCR variants of F9, awb4 and a1b4 were applied at concentrations of 0.1  $\mu M$ , 0.3  $\mu M$ , 1  $\mu M$ , 3.2  $\mu M$ , 10  $\mu M$ , 31.6  $\mu M$  and 100  $\mu M$ , respectively. Binding

equilibrium dissociation constants ( $K_D$ ) of approximately 50  $\mu$ M, 20  $\mu$ M and 2  $\mu$ M were determined for F9, awb4 and a1b4, respectively.

**A K.A2.COL6A3**

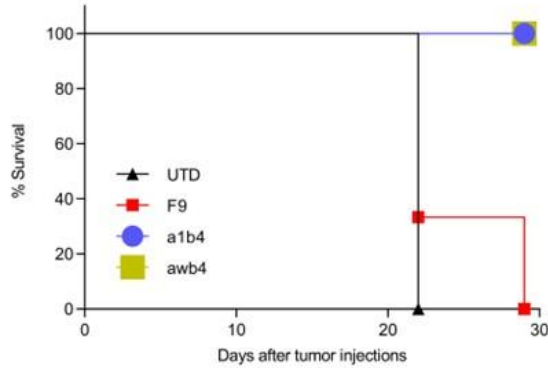

**B K.A2.COL6A1**

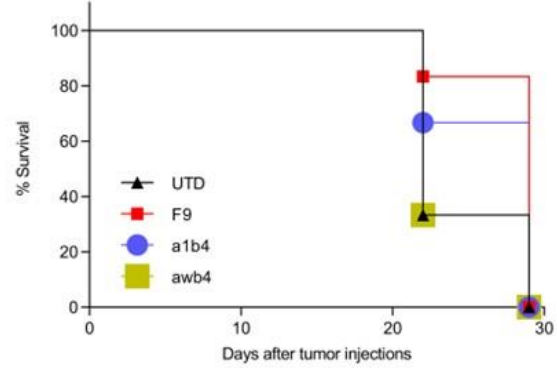

**C Gated on live CD4+ T cells**

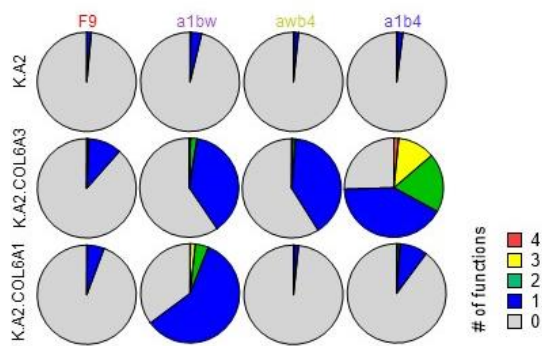

**D Gated on live CD8+ T cells**

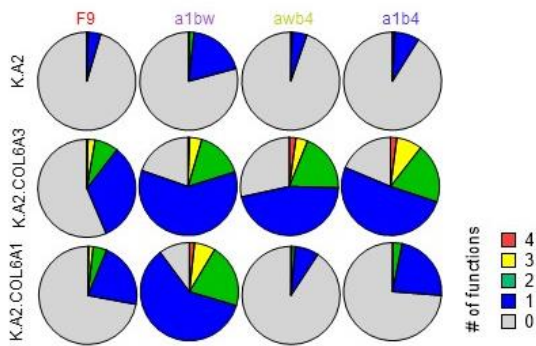

**Supplementary Figure 7. Survival curves of mice treated with affinity enhanced COL6A3 TCRs and polyfunctional analysis of COL6A3-specific T cells at the end of experiment.** Survival curves of K.A2.COL6A3 group (A) and K.A2.COL6A1 group (B) from the study described in Fig 6. Pie charts representing the number of cytokines CD4+ (C) or CD8+ (D) T cells produce.



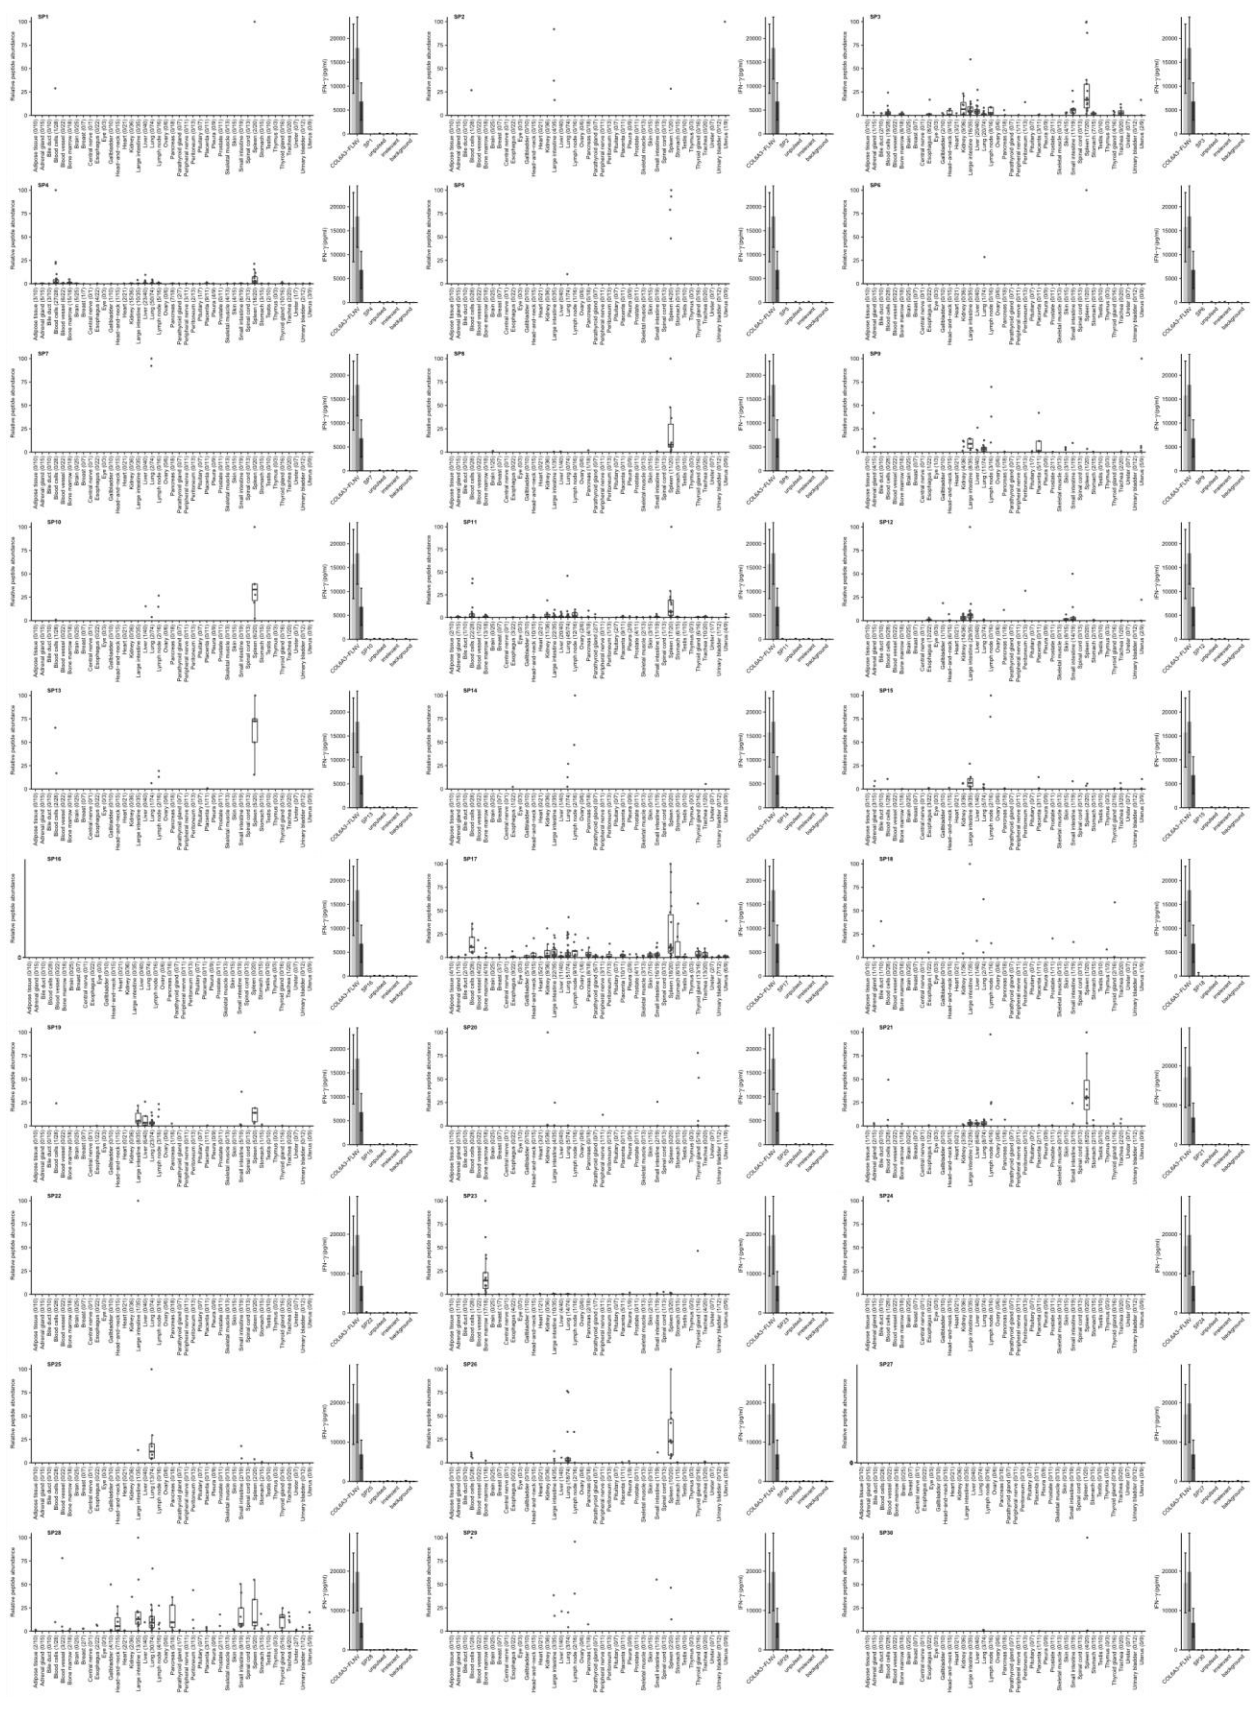

**Supplementary Figure 8. Peptide presentation and TCR reactivity for 30 similar peptides.** Relative abundance of HLA-bound peptides similar to COL6A3-FLVN isolated from normal samples. Each dot represents the median from five technical replicates of samples for which the peptide was detected and quantified. The number of donors with peptide detection as well as the total number per group is indicated in parentheses. Next to the data for each peptide is a bar graph showing the amount of IFN- $\gamma$  produced when TCR-transduced T cells [F9 (light gray), awb4 (gray) and a1b4 (dark gray)] were incubated with peptide-loaded T2 cells. Error bars represent the standard deviation of three biological replicates.

**Supplementary Table 1.** Differential expression analysis for COL6A3-FLNV by relative peptide quantitation using mass-spectrometry and exon expression analysis of COL6A3-E6 by mRNA-sequencing. Fold changes within the different tumor indications are determined with respect to average abundance on healthy tissues. The average abundance was computed by first determining the median abundances within each organ followed by using the geometric mean across all organs. If the peptide was not detected for the given tumor indication, no fold change could be determined indicated by “n.a.”.

| Tumor indication                      | Relative Peptide Quantitation COL6A3-FLNV |                   |                     | Exon Expression COL6A3-E6 |                   |                     |
|---------------------------------------|-------------------------------------------|-------------------|---------------------|---------------------------|-------------------|---------------------|
|                                       | Fold Change                               | Number of samples | p-value (corrected) | Fold Change               | Number of samples | p-value (corrected) |
| Acute myeloid leukemia                | n.a.                                      |                   |                     | 0.0                       | 22                | 1.0E+00             |
| Breast cancer                         | 22.6                                      | 22                | 6.7E-10             | 8.3                       | 15                | 2.7E-06             |
| Cholangiocellular carcinoma           | 22.3                                      | 5                 | 1.5E-04             | 21.1                      | 4                 | 5.7E-02             |
| Chronic lymphatic leukemia            | n.a.                                      |                   |                     | 0.0                       | 11                |                     |
| Colorectal cancer                     | 3.0                                       | 16                | 5.7E-05             | 5.1                       | 38                | 1.2E-06             |
| Esophageal cancer                     | 23.0                                      | 13                | 5.5E-06             | 13.4                      | 41                | 6.8E-14             |
| Gallbladder cancer                    | 9.5                                       | 4                 | 2.0E-02             | 9.0                       | 6                 | 1.3E-02             |
| Gastric cancer                        | 10.4                                      | 8                 | 7.3E-05             | 4.6                       | 18                | 1.1E-05             |
| Gastroesophageal junction cancer      | 1.7                                       | 2                 | 4.1E-01             | 0.4                       | 1                 |                     |
| Glioblastoma multiforme               | n.a.                                      |                   |                     | 1.2                       | 24                | 7.9E-01             |
| Head-and-neck squamous cell carcinoma | 9.0                                       | 15                | 2.1E-05             | 9.7                       | 43                | 3.3E-12             |
| Hepatocellular carcinoma              | 2.5                                       | 2                 | 3.1E-01             | 0.6                       | 41                | 1.0E+00             |
| Lung adenocarcinoma                   | 17.8                                      | 34                | 8.2E-17             | 7.5                       | 56                | 8.0E-17             |
| Melanoma                              | 5.1                                       | 4                 | 5.6E-02             | 8.2                       | 10                | 1.6E-03             |
| Non-Hodgkin-Lymphoma                  | 2.8                                       | 3                 | 4.9E-01             | 1.6                       | 14                | 6.2E-01             |
| Other non-small cell lung ca.         | 11.3                                      | 13                | 2.1E-05             | 13.7                      | 5                 | 4.5E-03             |
| Ovarian cancer                        | 11.0                                      | 13                | 9.5E-05             | 4.9                       | 36                | 1.0E-10             |
| Pancreatic cancer                     | 13.8                                      | 8                 | 6.0E-05             | 8.2                       | 26                | 8.3E-09             |
| Prostate cancer                       | n.a.                                      |                   |                     | 1.2                       | 20                | 1.9E-01             |
| Renal cell carcinoma                  | 8.7                                       | 2                 | 7.0E-02             | 0.6                       | 15                | 1.0E+00             |
| Small cell lung carcinoma             | 18.5                                      | 11                | 2.3E-07             | 6.0                       | 13                | 4.4E-05             |
| Squamous cell lung carcinoma          | 22.3                                      | 25                | 4.9E-12             | 13.9                      | 45                | 1.2E-22             |
| Urinary bladder cancer                | 5.4                                       | 6                 | 2.6E-02             | 2.1                       | 11                | 1.0E-01             |
| Uterus endometrial cancer             | 2.7                                       | 4                 | 1.5E-01             | 2.5                       | 14                | 8.8E-02             |

**Supplementary Table 2.** Microscopic evaluation of *COL6A3-E6* RNA expression determined by in situ hybridization in cancer samples from pancreas cancer (PC), colorectal cancer (CRC), breast cancer (BRCA), ovarian cancer (OC), gastric cancer (GC), head-and-neck squamous cell cancer (HNSCC), non-small cell lung carcinoma (NSCLC) and esophageal cancer (EC). Staining intensity (SI) in stroma or tumor cells was assessed as dots per cell and the pre-dominant phenotype was categorized in SI scores ranging from 0 to 4. The frequency of stroma or tumor cells showing the pre-dominant SI score was estimated in percent and categorized as percent points (PP) from 0 to 4. For each sample a combined immunoreactive score (IRS) was calculated for stroma and tumor cells respectively as follows: IRS = SI x PP.

| Tissues (n=30) | COL6A3-E6 FPKM | Stroma area           |                                    |              | Tumor area            |                                   |              |
|----------------|----------------|-----------------------|------------------------------------|--------------|-----------------------|-----------------------------------|--------------|
|                |                | Signal Intensity [SI] | Percent positive stroma cells [PP] | combined IRS | Signal Intensity [SI] | Percent positive tumor cells [PP] | combined IRS |
| PC1            | n/a            | SI3                   | 60 %                               | IRS 9        | 0                     | 0                                 | 0            |
| CRC1           | 0.76           | SI2                   | 60 %                               | IRS 6        | 0                     | 0                                 | 0            |
| BRCA1          | 0.88           | SI3-4                 | 51 %                               | IRS9-12      | 0                     | 0                                 | 0            |
| EC1            | 0.89           | SI4                   | >95 %                              | IRS16        | 0                     | 0                                 | 0            |
| BRCA2          | 1.20           | SI4                   | 75 %                               | IRS12        | 0                     | 0                                 | 0            |
| BRCA3          | 1.70           | SI3                   | 81 %                               | IRS12        | 0                     | 0                                 | 0            |
| HNSCC1         | 2.59           | SI4                   | 90 %                               | IRS 16       | 0                     | 0                                 | 0            |
| BRCA4          | 3.11           | SI4                   | 66 %                               | IRS 12       | 0                     | 0                                 | 0            |
| NSCLC1         | 3.58           | SI2                   | 60 %                               | IRS 6        | 0                     | 0                                 | 0            |
| BRCA5          | 3.91           | SI4                   | 60 %                               | IRS 12       | SI1                   | 5 %                               | IRS 1        |
| BRCA6          | 4.04           | SI4                   | 81 %                               | IRS 16       | SI1                   | 33 %                              | IRS 2        |
| OC1            | 4.04           | SI3                   | 81 %                               | IRS 12       | 0                     | 0                                 | 0            |
| NSCLC2         | 4.23           | SI2                   | 79 %                               | IRS 6        | 0                     | 0                                 | 0            |
| NSCLC3         | 4.88           | SI4                   | 66 %                               | IRS 12       | 0                     | 0                                 | 0            |
| EC2            | 5.92           | SI3                   | 70 %                               | IRS 9        | 0                     | 0                                 | 0            |
| HNSCC2         | 6.22           | SI4                   | 90 %                               | IRS 16       | 0                     | 0                                 | 0            |
| HNSCC3         | 6.45           | SI4                   | 90 %                               | IRS 16       | 0                     | 0                                 | 0            |
| NSCLC4         | 6.53           | SI3                   | 49 %                               | IRS 6        | 0                     | 0                                 | 0            |
| BRCA7          | 7.47           | SI4                   | 66 %                               | IRS 12       | 0                     | 0                                 | 0            |
| EC3            | 8.72           | SI4                   | 90 %                               | IRS 16       | 0                     | 0                                 | 0            |
| EC4            | 10.17          | SI4                   | 90 %                               | IRS 16       | 0                     | 0                                 | 0            |
| NSCLC5         | 10.68          | SI3                   | 60 %                               | IRS 9        | 0                     | 0                                 | 0            |
| NSCLC6         | 10.96          | SI4                   | 90 %                               | IRS 16       | 0                     | 0                                 | 0            |
| GC1            | 12.36          | SI3                   | 75 %                               | IRS 9        | 0                     | 0                                 | 0            |
| NSCLC7         | 17.02          | SI4                   | 100 %                              | IRS 16       | SI2                   | 50 %                              | IRS 4        |
| HNSCC4         | 24.61          | SI4                   | 95 %                               | IRS 16       | 0                     | 0                                 | 0            |
| NSCLC8         | 25.95          | SI4                   | 90 %                               | IRS 16       | 0                     | 0                                 | 0            |
| EC5            | 27.75          | SI4                   | 90 %                               | IRS 16       | SI1                   | 10 %                              | IRS 1        |
| NSCLC9         | 30.04          | SI4                   | 90 %                               | IRS 16       | 0                     | 0                                 | 0            |
| HNSCC5         | 51.30          | SI4                   | >95 %                              | IRS 16       | 0                     | 0                                 | 0            |

| Immunoreactivity score (IRS) |                     |               |                 |                 |                   |                |
|------------------------------|---------------------|---------------|-----------------|-----------------|-------------------|----------------|
| SI x PP = IRS                |                     |               |                 |                 |                   |                |
| (SI) Signal intensity        | Percent Points (PP) | SI0           | SI1             | SI2             | SI3               | SI4            |
|                              |                     | 0 (dots/cell) | 1-3 (dots/cell) | 4-9 (dots/cell) | 10-15 (dots/cell) | >15 or cluster |
| PP0                          | 0 %                 | 0             | 0               | 0               | 0                 | 0              |
| PP1                          | 1-10 %              | 0             | 1               | 2               | 3                 | 4              |
| PP2                          | 11-50 %             | 0             | 2               | 4               | 6                 | 8              |
| PP3                          | 51-80 %             | 0             | 3               | 6               | 9                 | 12             |
| PP4                          | >80 %               | 0             | 4               | 8               | 12                | 16             |

**Supplementary Table 3.** Characterized TCRs with IMGT identifier of variable alpha (TRAV), joining alpha (TRAJ), variable beta (TRBV) and joining beta chain (TRBJ) as well as sequences for complementarity-determining regions.

| TCR  | TRAV    | TRAJ  | TRBV   | TRBJ   | CDRa1  | CDRa3        | CDRb1  | CDRb3          |
|------|---------|-------|--------|--------|--------|--------------|--------|----------------|
| D10  | 12-2*01 | 30*01 | 9*02   | 1-2*01 | DRGSQS | AVNFHDKII    | RSGDLS | ASSVASAYGYT    |
| H3   | 12-2*01 | 49*01 | 7-8*01 | 2-1*01 | DRGSQS | AVKAGNQFY    | ISGHVS | ASSLLTSGGDNEQF |
| F9   | 12-2*01 | 28*01 | 9*01   | 1-2*01 | DRGSQS | AAYSGAGSYQLT | RSGDLS | ASSVESSYGYT    |
| a1bw | 12-2*01 | 28*01 | 9*01   | 1-2*01 | DRRSQS | AAYSGAGSYQLT | RSGDLS | ASSVESSYGYT    |
| awb4 | 12-2*01 | 28*01 | 9*01   | 1-2*01 | DRGSQS | AAYSGAGSYQLT | AMDHPY | ASSVESSYGYT    |
| a1b4 | 12-2*01 | 28*01 | 9*01   | 1-2*01 | DRRSQS | AAYSGAGSYQLT | AMDHPY | ASSVESSYGYT    |

**Supplementary Table 4.** Similar peptides used for TCR characterization and affinity engineering. Gene symbol and description as well as the protein position of the used peptides is listed. Positions with amino acids identical to the target peptide COL6A3-FLNV are highlighted in red.

| Gene symbol | Gene description                            | Peptide sequence | Peptide name | Source protein and position |
|-------------|---------------------------------------------|------------------|--------------|-----------------------------|
| COL6A1      | collagen, type VI, alpha 1                  | ILLDGSASV        | COL6A1-ILSV  | P12109 p832-840             |
| COL6A3      | collagen, type VI, alpha 3                  | FLFDGSANL        | COL6A3-FLNL  | P12111 p840-848             |
|             |                                             | FLFDGSANLV       | COL6A3-FLLV  | P12111 p840-849             |
|             |                                             | FLLDGSEGV        | COL6A3-FLGV  | P12111 p1032-1040           |
| VWA2        | von Willebrand factor A domain containing 2 | FLLDGSNSV        | VWA2-FLSV    | Q5GFL6 p54-62               |
| VWF         | von Willebrand factor                       | FLLDGSSRL        | VWF-FLRL     | P04275 p1280-1288           |
| CLASP1      | cytoplasmic linker associated protein 1     | RLLDGAFLK        | CLASP1-RLKL  | Q7Z460 p367-375             |
